# Supplementary material
Source: PubMed Central journal article supplement (PMC4046724)
Supplement: CJN.07870713_CJN07870713SupplementaryData.pdf [file CJN.07870713_CJN07870713SupplementaryData.pdf]

**Table S 1 Baseline characteristics of study participants after stratification by tertiles of sKlotho**

|                           | Tertile 1<br>n=148<br>(171-358 pg/ml) | Tertile 2<br>n=148<br>(359-444 pg/ml) | Tertile 3<br>n=148<br>(446-2054 pg/ml) | p    |
|---------------------------|---------------------------------------|---------------------------------------|----------------------------------------|------|
| Age (years)               | 67 ± 11                               | 65 ± 11                               | 63 ± 14                                | 0.02 |
| Women                     | 54 (37 %)                             | 63 (43 %)                             | 62 (42 %)                              | 0.51 |
| Smokers                   | 16 (11 %)                             | 14 (9 %)                              | 14 (9 %)                               | 0.90 |
| Diabetes mellitus         | 55 (37 %)                             | 53 (36 %)                             | 60 (50 %)                              | 0.69 |
| Prevalent CVD             | 51 (34 %)                             | 41 (28 %)                             | 43 (29 %)                              | 0.41 |
| CRP (mg/l)                | 2.9 (1.4-6.0)                         | 2.9 (1.1-5.6)                         | 2.4 (1.1-4.4)                          | 0.01 |
| Total cholesterol (mg/dl) | 195 ± 40                              | 190 ± 40                              | 194 ± 46                               | 0.58 |
| HDL-C (mg/dl)             | 51 ± 17                               | 53 ± 18                               | 51 ± 17                                | 0.35 |
| LDL-C (mg/dl)             | 119 ± 34                              | 112 ± 35                              | 116 ± 36                               | 0.16 |
| BMI (kg/m <sup>2</sup> )  | 30 ± 5                                | 30 ± 6                                | 30 ± 6                                 | 0.85 |

|                                    | Tertile 1<br>n=148<br>(171-358 pg/ml) | Tertile 2<br>n=148<br>(359-444 pg/ml) | Tertile 3<br>n=148<br>(446-2054 pg/ml) | p      |
|------------------------------------|---------------------------------------|---------------------------------------|----------------------------------------|--------|
| Calcium (mmol/l)                   | 2.4 ± 0.1                             | 2.4 ± 0.1                             | 2.4 ± 0.1                              | 0.70   |
| Phosphate (mg/dl)                  | 3.5 ± 0.7                             | 3.4 ± 0.8                             | 3.3 ± 0.6                              | 0.24   |
| FGF-23 (rU/ml)                     | 107 (70-193)                          | 103 (60-150)                          | 89 (60-151)                            | 0.85   |
| sKlotho (pg/ml)                    | 296 (260-326)                         | 397 (375-425)                         | 565 (484-664)                          | <0.001 |
| PTH (pg/ml)                        | 52 (35-85)                            | 54 (38-88)                            | 54 (38-78)                             | 0.70   |
| eGFR (ml/min/1.73 m <sup>2</sup> ) | 42 ± 14                               | 46 ± 18                               | 47 ± 15                                | 0.009  |
| UAE (mg/g creatinine)              | 30 (7-177)                            | 27 (6-198)                            | 51 (15-206)                            | 0.32   |
| FePi                               | 26 ± 13 %                             | 25 ± 13 %                             | 26 ± 13 %                              | 0.58   |
| BB intake                          | 107 (72 %)                            | 104 (70 %)                            | 90 (61 %)                              | 0.08   |
| ACE-I intake                       | 55 (37 %)                             | 53 (36 %)                             | 57 (39 %)                              | 0.89   |
| Statin intake                      | 77 (52 %)                             | 78 (53 %)                             | 61 (41 %)                              | 0.09   |

|                                              | Tertile 1<br>n=148<br>(171-358 pg/ml) | Tertile 2<br>n=148<br>(359-444 pg/ml) | Tertile 3<br>n=148<br>(446-2054 pg/ml) | p    |
|----------------------------------------------|---------------------------------------|---------------------------------------|----------------------------------------|------|
| unhydroxylated Vitamin D <sub>3</sub> intake | 66 (45 %)                             | 62 (42 %)                             | 61 (41 %)                              | 0.82 |
| active Vitamin D <sub>3</sub> intake         | 15 (10 %)                             | 8 (5 %)                               | 10 (7 %)                               | 0.28 |

Abbreviations: CVD, cardiovascular disease; CRP, C-reactive protein; HDL-C, high density lipoprotein cholesterol; LDL-C, low density lipoprotein cholesterol, BMI, body mass index; FGF-23, Fibroblast Growth Factor-23; sKlotho, soluble Klotho; PTH, parathyroid hormone; eGFR, estimated glomerular filtration rate; UAE, urinary albumin excretion; FePi, urinary fractional phosphate excretion; BB, beta blocker; ACE-I, angiotensin converting enzyme inhibitor. Variables are depicted as numbers of patients (percentage), as mean value  $\pm$  standard deviation, or as median (interquartile range), as appropriate.

**Table S 2 Baseline characteristics of study participants after stratification by tertiles of FGF-23**

|                           | Tertile 1<br>n = 148<br>(14.8-72.9 rU/ml) | Tertile 2<br>n = 148<br>(73.3-139.3 rU/ml) | Tertile 3<br>n=148<br>(139.8-7441.8 rU/ml) | p      |
|---------------------------|-------------------------------------------|--------------------------------------------|--------------------------------------------|--------|
| Age (years)               | 62 ± 12                                   | 65 ± 14                                    | 65 ± 12                                    | <0.001 |
| Women                     | 53 (36 %)                                 | 62 (42 %)                                  | 64 (43 %)                                  | 0.38   |
| Smokers                   | 15 (10 %)                                 | 11 (7 %)                                   | 18 (12 %)                                  | 0.39   |
| Diabetes mellitus         | 47 (32 %)                                 | 56 (38 %)                                  | 65 (44 %)                                  | 0.10   |
| Prevalent CVD             | 34 (23 %)                                 | 47 (32 %)                                  | 54 (36 %)                                  | 0.04   |
| CRP (mg/l)                | 2.3 (1.0-5.1)                             | 2.4 (1.1-4.4)                              | 3.9 (1.4-8.0)                              | <0.001 |
| Total cholesterol (mg/dl) | 194 ± 41                                  | 196 ± 43                                   | 189 ± 42                                   | 0.26   |
| HDL-C (mg/dl)             | 54 ± 19                                   | 51 ± 17                                    | 49 ± 16                                    | 0.03   |
| LDL-C (mg/dl)             | 118 ± 35                                  | 116 ± 36                                   | 116 ± 35                                   | 0.50   |
| BMI (kg/m <sup>2</sup> )  | 30 ± 6                                    | 30 ± 5                                     | 30 ± 6                                     | 0.92   |
| Calcium (mmol/l)          | 2.4 ± 0.1                                 | 2.4 ± 0.1                                  | 2.4 ± 0.1                                  | 0.45   |

|                                              | Tertile 1<br>n = 148<br>(14.8-72.9 rU/ml) | Tertile 2<br>n = 148<br>(73.3-139.3 rU/ml) | Tertile 3<br>n=148<br>(139.8-7441.8 rU/ml) | p      |
|----------------------------------------------|-------------------------------------------|--------------------------------------------|--------------------------------------------|--------|
| Phosphate (mg/dl)                            | 3.2 ± 0.5                                 | 3.3 ± 0.8                                  | 3.7 ± 0.7                                  | <0.001 |
| FGF-23 (rU/ml)                               | 53 (41-64)                                | 101 (88-117)                               | 205 (163-337)                              | <0.001 |
| sKlotho (pg/ml)                              | 418 (344-550)                             | 384 (339-450)                              | 388 (303-466)                              | 0.07   |
| PTH (pg/ml)                                  | 45 (33-58)                                | 53 (38-78)                                 | 74 (47-134)                                | <0.001 |
| eGFR (ml/min/1.73 m <sup>2</sup> )           | 55 ± 12                                   | 47 ± 14                                    | 33 ± 13                                    | <0.001 |
| UAE (mg/g creatinine)                        | 18 (5-67)                                 | 31 (8-150)                                 | 100 (22-505)                               | 0.001  |
| FePi (%)                                     | 20 ± 9                                    | 24 ± 12                                    | 33 ± 14                                    | <0.001 |
| BB intake                                    | 81 (55 %)                                 | 109 (74 %)                                 | 111 (75 %)                                 | <0.001 |
| ACE-I intake                                 | 48 (32 %)                                 | 63 (43 %)                                  | 54 (36 %)                                  | 0.19   |
| Statin intake                                | 63 (43 %)                                 | 77 (52 %)                                  | 76 (51 %)                                  | 0.19   |
| unhydroxylated Vitamin D <sub>3</sub> intake | 48 (32 %)                                 | 63 (43 %)                                  | 78 (53 %)                                  | 0.002  |
| activeVitamin D <sub>3</sub> intake          | 2 (1 %)                                   | 4 (3 %)                                    | 27 (18 %)                                  | <0.001 |

Abbreviations: CVD, cardiovascular disease; CRP, C-reactive protein; HDL-C: high density lipoprotein cholesterol; LDL-C, low density lipoprotein cholesterol, BMI, body mass index; FGF-23, Fibroblast Growth Factor-23; sKlotho, soluble Klotho; PTH, parathyroid hormone; eGFR, estimated glomerular filtration rate; UAE, urinary albumin excretion; FePi, urinary fractional phosphate excretion; BB, beta blocker; ACE-I, angiotensin converting enzyme inhibitor. Variables are depicted as numbers of patients (percentage), as mean value  $\pm$  standard deviation, or as median (interquartile range), as appropriate.

**Table S 3 Cox regression analysis: Atherosclerotic events / death with categorized independent variables**

| Univariate analysis    |        |           | Adjustment for eGFR and<br>ln albuminuria |        |           | Adjustment for eGFR,<br>ln albuminuria, age and<br>gender |        |           | Adjustment for eGFR,<br>ln albuminuria, age,<br>gender, diabetes mellitus<br>and CVD |        |           | Adjustment for eGFR,<br>ln albuminuria, age,<br>gender, diabetes mellitus,<br>CVD and CKD-MBD*<br>parameters |        |           |      |
|------------------------|--------|-----------|-------------------------------------------|--------|-----------|-----------------------------------------------------------|--------|-----------|--------------------------------------------------------------------------------------|--------|-----------|--------------------------------------------------------------------------------------------------------------|--------|-----------|------|
| HR                     | 95% CI | p         | HR                                        | 95% CI | p         | HR                                                        | 95% CI | p         | HR                                                                                   | 95% CI | p         | HR                                                                                                           | 95% CI | p         |      |
| <b>sKlotho (pg/ml)</b> |        |           |                                           |        |           |                                                           |        |           |                                                                                      |        |           |                                                                                                              |        |           |      |
| Tertile 1              | 1.00   | -         | -                                         | 1.00   | -         | -                                                         | 1.00   | -         | -                                                                                    | 1.00   | -         | -                                                                                                            | 1.00   | -         | -    |
| Tertile 2              | 0.72   | 0.42-1.25 | 0.25                                      | 0.82   | 0.47-1.42 | 0.48                                                      | 0.84   | 0.49-1.46 | 0.54                                                                                 | 0.70   | 0.40-1.22 | 0.21                                                                                                         | 0.69   | 0.39-1.22 | 0.20 |
| Tertile 3              | 0.75   | 0.44-1.29 | 0.30                                      | 0.83   | 0.48-1.43 | 0.50                                                      | 0.85   | 0.49-1.47 | 0.56                                                                                 | 0.75   | 0.43-1.29 | 0.30                                                                                                         | 0.75   | 0.43-1.30 | 0.30 |
| <b>FGF-23 (rU/ml)</b>  |        |           |                                           |        |           |                                                           |        |           |                                                                                      |        |           |                                                                                                              |        |           |      |
| Tertile 1              | 1.00   | -         | -                                         | 1.00   | -         | -                                                         | 1.00   | -         | -                                                                                    | 1.00   | -         | -                                                                                                            | 1.00   | -         | -    |
| Tertile 2              | 1.78   | 0.94-3.38 | 0.08                                      | 1.33   | 0.68-2.60 | 0.40                                                      | 1.56   | 0.80-3.04 | 0.19                                                                                 | 1.58   | 0.81-3.06 | 0.18                                                                                                         | 1.53   | 0.79-2.97 | 0.21 |
| Tertile 3              | 2.58   | 1.42-4.70 | 0.002                                     | 1.28   | 0.61-2.72 | 0.52                                                      | 1.27   | 0.59-2.71 | 0.54                                                                                 | 1.24   | 0.59-2.62 | 0.57                                                                                                         | 1.23   | 0.58-2.61 | 0.59 |

\* Ln sKlotho, PTH, FePi, phosphate and / or Ln FGF-23, as appropriate

Abbreviations: sKlotho, soluble Klotho; PTH, parathyroid hormone; FePi, urinary fractional phosphate excretion; FGF-23, Fibroblast Growth Factor-23; eGFR, estimated glomerular filtration rate; CVD: prevalent cardiovascular disease. Presented are hazard ratio (HR), 95% confidence interval (CI) and levels of significance (p).



**Table S 4 Cox regression analysis: decompensated heart failure / death with categorized variables**

|                        | Univariate analysis |            |        | Adjustment for eGFR and ln albuminuria |            |      | Adjustment for eGFR, ln albuminuria, age and gender |            |       | Adjustment for eGFR, ln albuminuria, age, gender, diabetes mellitus and CVD |            |      | Adjustment for eGFR, ln albuminuria, age, gender, diabetes mellitus, CVD and CKD-MBD* parameters |            |      |
|------------------------|---------------------|------------|--------|----------------------------------------|------------|------|-----------------------------------------------------|------------|-------|-----------------------------------------------------------------------------|------------|------|--------------------------------------------------------------------------------------------------|------------|------|
|                        | HR                  | 95% CI     | p      | HR                                     | 95% CI     | p    | HR                                                  | 95% CI     | p     | HR                                                                          | 95% CI     | p    | HR                                                                                               | 95% CI     | p    |
| <b>sKlotho (pg/ml)</b> |                     |            |        |                                        |            |      |                                                     |            |       |                                                                             |            |      |                                                                                                  |            |      |
| Tertile 1              | 1.00                | -          | -      | 1.00                                   | -          | -    | 1.00                                                | -          | -     | 1.00                                                                        | -          | -    | 1.00                                                                                             | -          | -    |
| Tertile 2              | 0.64                | 0.31-1.34  | 0.24   | 0.70                                   | 0.33-1.47  | 0.34 | 0.70                                                | 0.33-1.47  | 0.35  | 0.60                                                                        | 0.28-1.28  | 0.19 | 0.50                                                                                             | 0.23-1.08  | 0.08 |
| Tertile 3              | 0.80                | 0.40-1.60  | 0.52   | 0.92                                   | 0.45-1.85  | 0.81 | 0.96                                                | 0.47-1.95  | 0.91  | 0.87                                                                        | 0.43-1.78  | 0.71 | 0.81                                                                                             | 0.39-1.66  | 0.56 |
| <b>FGF-23 (rU/ml)</b>  |                     |            |        |                                        |            |      |                                                     |            |       |                                                                             |            |      |                                                                                                  |            |      |
| Tertile 1              | 1.00                | -          | -      | 1.00                                   | -          | -    | 1.00                                                | -          | -     | 1.00                                                                        | -          | -    | 1.00                                                                                             | -          | -    |
| Tertile 2              | 3.07                | 0.99-9.52  | 0.05   | 2.54                                   | 0.79-8.12  | 0.12 | 2.92                                                | 0.92-9.27  | 0.07  | 2.83                                                                        | 0.89-9.01  | 0.08 | 2.86                                                                                             | 0.90-9.12  | 0.08 |
| Tertile 3              | 7.32                | 2.57-20.87 | <0.001 | 4.67                                   | 1.40-15.61 | 0.01 | 5.03                                                | 1.49-16.94 | 0.009 | 4.77                                                                        | 1.42-15.99 | 0.01 | 4.51                                                                                             | 1.33-15.21 | 0.02 |

\* Ln sKlotho, PTH, FePi, phosphate and / or Ln FGF-23, as appropriate

Abbreviations: sKlotho, soluble Klotho; PTH, parathyroid hormone; FePi, urinary fractional phosphate excretion; FGF-23, Fibroblast Growth Factor-23; eGFR, estimated glomerular filtration rate; CVD: prevalent cardiovascular disease. Presented are hazard ratio (HR), 95% confidence interval (CI) and levels of significance (p).

**Table S 5 Cox regression analysis: Decompensated heart failure**

|                    | Univariate analysis |           |        | Adjustment for eGFR and ln albuminuria |           |        | Adjustment for eGFR, ln albuminuria, age and gender |           |       | Adjustment for eGFR, ln albuminuria, age, gender, diabetes mellitus and CVD |           |       | Adjustment for eGFR, ln albuminuria, age, gender, diabetes mellitus, CVD and CKD-MBD* parameters |           |      |
|--------------------|---------------------|-----------|--------|----------------------------------------|-----------|--------|-----------------------------------------------------|-----------|-------|-----------------------------------------------------------------------------|-----------|-------|--------------------------------------------------------------------------------------------------|-----------|------|
|                    | HR                  | 95% CI    | p      | HR                                     | 95% CI    | p      | HR                                                  | 95% CI    | p     | HR                                                                          | 95% CI    | p     | HR                                                                                               | 95% CI    | p    |
| Ln sKlotho (pg/ml) | 0.95                | 0.27-3.40 | 0.94   | 1.24                                   | 0.35-4.38 | 0.74   | 1.15                                                | 0.36-3.64 | 0.81  | 1.06                                                                        | 0.31-3.66 | 0.92  | 1.02                                                                                             | 0.29-3.65 | 0.97 |
| PTH (pg/ml)        | 1.01                | 1.00-1.01 | 0.001  | 1.00                                   | 1.00-1.01 | 0.28   | 1.00                                                | 1.00-1.01 | 0.26  | 1.00                                                                        | 1.00-1.01 | 0.16  | 1.00                                                                                             | 1.00-1.01 | 0.38 |
| FePi (%)           | 1.04                | 1.01-1.07 | 0.003  | 1.01                                   | 0.98-1.05 | 0.54   | 1.01                                                | 0.97-1.05 | 0.71  | 1.01                                                                        | 0.96-1.05 | 0.81  | 1.02                                                                                             | 0.97-1.07 | 0.56 |
| Phosphate (mg/dl)  | 1.65                | 1.21-2.25 | 0.002  | 1.37                                   | 0.90-2.09 | 0.15   | 1.39                                                | 0.88-2.20 | 0.16  | 1.54                                                                        | 0.95-2.49 | 0.07  | 1.59                                                                                             | 0.87-2.93 | 0.14 |
| Ln FGF-23 (rU/ml)  | 2.35                | 1.71-3.23 | <0.001 | 2.03                                   | 1.38-3.01 | <0.001 | 1.81                                                | 1.24-2.64 | 0.002 | 1.74                                                                        | 1.18-2.56 | 0.005 | 1.62                                                                                             | 1.08-2.43 | 0.02 |

\* Ln sKlotho, PTH, FePi, phosphate and / or Ln FGF-23, as appropriate

Abbreviations: sKlotho, soluble Klotho; PTH, parathyroid hormone; FePi, urinary fractional phosphate excretion; FGF-23, Fibroblast Growth Factor-23; eGFR, estimated glomerular filtration rate; CVD: prevalent cardiovascular disease. Presented are hazard ratio (HR), 95% confidence interval (CI) and levels of significance (p).

**Table S 6 Cox regression analysis: Total mortality**

|                    | Univariate analysis |           |        | Adjustment for eGFR and ln albuminuria |           |        | Adjustment for eGFR, ln albuminuria, age and gender |           |        | Adjustment for eGFR, ln albuminuria, age, gender, diabetes mellitus and CVD |           |       | Adjustment for eGFR, ln albuminuria, age, gender, diabetes mellitus, CVD and CKD-MBD* parameters |           |       |
|--------------------|---------------------|-----------|--------|----------------------------------------|-----------|--------|-----------------------------------------------------|-----------|--------|-----------------------------------------------------------------------------|-----------|-------|--------------------------------------------------------------------------------------------------|-----------|-------|
|                    | HR                  | 95% CI    | p      | HR                                     | 95% CI    | p      | HR                                                  | 95% CI    | p      | HR                                                                          | 95% CI    | p     | HR                                                                                               | 95% CI    | p     |
| Ln sKlotho (pg/ml) | 1.75                | 0.58-5.24 | 0.32   | 1.94                                   | 0.65-5.79 | 0.24   | 1.67                                                | 0.62-4.53 | 0.31   | 1.65                                                                        | 0.57-4.75 | 0.36  | 1.54                                                                                             | 0.52-4.58 | 0.44  |
| PTH (pg/ml)        | 1.01                | 1.00-1.01 | 0.01   | 1.00                                   | 1.00-1.01 | 0.34   | 1.00                                                | 1.00-1.01 | 0.28   | 1.00                                                                        | 1.00-1.01 | 0.16  | 1.00                                                                                             | 1.00-1.01 | 0.25  |
| FePi (%)           | 1.04                | 1.01-1.06 | 0.003  | 1.02                                   | 0.99-1.06 | 0.20   | 1.02                                                | 0.98-1.06 | 0.32   | 1.02                                                                        | 0.98-1.06 | 0.38  | 1.01                                                                                             | 0.97-1.05 | 0.72  |
| Phosphate (mg/dl)  | 1.16                | 0.76-1.79 | 0.50   | 0.86                                   | 0.51-1.43 | 0.56   | 0.83                                                | 0.47-1.45 | 0.51   | 0.89                                                                        | 0.50-1.59 | 0.70  | 0.81                                                                                             | 0.42-1.57 | 0.53  |
| Ln FGF-23 (rU/ml)  | 2.13                | 1.66-2.72 | <0.001 | 1.86                                   | 1.37-2.54 | <0.001 | 1.71                                                | 1.27-2.29 | <0.001 | 1.66                                                                        | 1.24-2.24 | 0.001 | 1.60                                                                                             | 1.17-2.18 | 0.003 |

\* Ln sKlotho, PTH, FePi, phosphate and / or Ln FGF-23, as appropriate

Abbreviations: sKlotho, soluble Klotho; PTH, parathyroid hormone; FePi, urinary fractional phosphate excretion; FGF-23, Fibroblast Growth Factor-23; eGFR, estimated glomerular filtration rate; CVD: prevalent cardiovascular disease. Presented are hazard ratio (HR), 95% confidence interval (CI) and levels of significance (p).

**Table S 7 Cox regression analysis: Atherosclerotic events**

|                    | Univariate analysis |           |        | Adjustment for eGFR and ln albuminuria |           |      | Adjustment for eGFR, ln albuminuria, age and gender |           |      | Adjustment for eGFR, ln albuminuria, age, gender, diabetes mellitus and CVD |           |      | Adjustment for eGFR, ln albuminuria, age, gender, diabetes mellitus, CVD and CKD-MBD* parameters |           |      |
|--------------------|---------------------|-----------|--------|----------------------------------------|-----------|------|-----------------------------------------------------|-----------|------|-----------------------------------------------------------------------------|-----------|------|--------------------------------------------------------------------------------------------------|-----------|------|
|                    | HR                  | 95% CI    | p      | HR                                     | 95% CI    | p    | HR                                                  | 95% CI    | p    | HR                                                                          | 95% CI    | p    | HR                                                                                               | 95% CI    | p    |
| Ln sKlotho (pg/ml) | 0.68                | 0.32-1.44 | 0.31   | 0.81                                   | 0.38-1.70 | 0.58 | 0.78                                                | 0.38-1.59 | 0.49 | 0.59                                                                        | 0.28-1.26 | 0.17 | 0.60                                                                                             | 0.28-1.26 | 0.18 |
| PTH (pg/ml)        | 1.00                | 1.00-1.01 | 0.006  | 1.00                                   | 1.00-1.00 | 0.81 | 1.00                                                | 1.00-1.00 | 0.82 | 1.00                                                                        | 1.00-1.00 | 0.83 | 1.00                                                                                             | 1.00-1.00 | 0.84 |
| FePi (%)           | 1.03                | 1.02-1.05 | <0.001 | 1.01                                   | 1.00-1.03 | 0.37 | 1.01                                                | 0.98-1.03 | 0.72 | 1.00                                                                        | 0.97-1.02 | 0.82 | 1.00                                                                                             | 0.98-1.03 | 0.77 |
| Phosphate (mg/dl)  | 1.40                | 1.12-1.78 | 0.005  | 1.09                                   | 0.81-1.47 | 0.57 | 1.09                                                | 0.80-1.49 | 0.59 | 1.21                                                                        | 0.87-1.68 | 0.26 | 1.22                                                                                             | 0.85-1.75 | 0.29 |
| Ln FGF-23 (rU/ml)  | 1.51                | 1.21-1.89 | <0.001 | 1.11                                   | 0.82-1.51 | 0.49 | 1.08                                                | 0.80-1.45 | 0.63 | 1.05                                                                        | 0.79-1.40 | 0.74 | 1.04                                                                                             | 0.77-1.40 | 0.80 |

\* Ln sKlotho, PTH, FePi, phosphate and / or Ln FGF-23, as appropriate

Abbreviations: sKlotho, soluble Klotho; PTH, parathyroid hormone; FePi, urinary fractional phosphate excretion; FGF-23, Fibroblast Growth Factor-23; eGFR, estimated glomerular filtration rate; CVD: prevalent cardiovascular disease. Presented are hazard ratio (HR), 95% confidence interval (CI) and levels of significance (p).



## **Figure legend**

**Figure S1:** FGF-23 tertiles and event-free survival from decompensated heart failure / death in the (a) lowest, (b) intermediate and (c) highest tertile of sKlotho (Kaplan-Meier analysis with log-rank test).

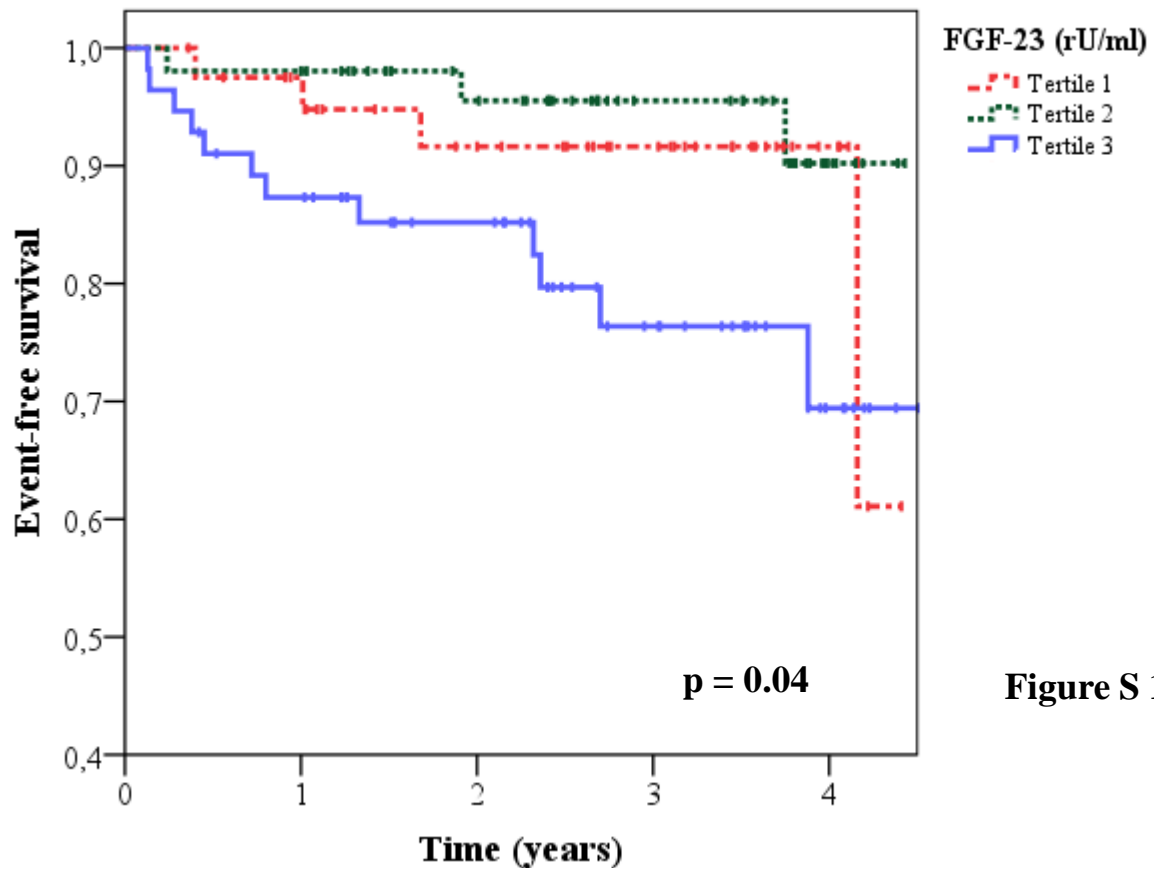

**Figure S 1 a**

**Number at risk**

|                  |    |    |    |   |
|------------------|----|----|----|---|
| <b>Tertile 1</b> | 35 | 27 | 19 | 5 |
| <b>Tertile 2</b> | 49 | 37 | 22 | 5 |
| <b>Tertile 3</b> | 46 | 35 | 20 | 6 |

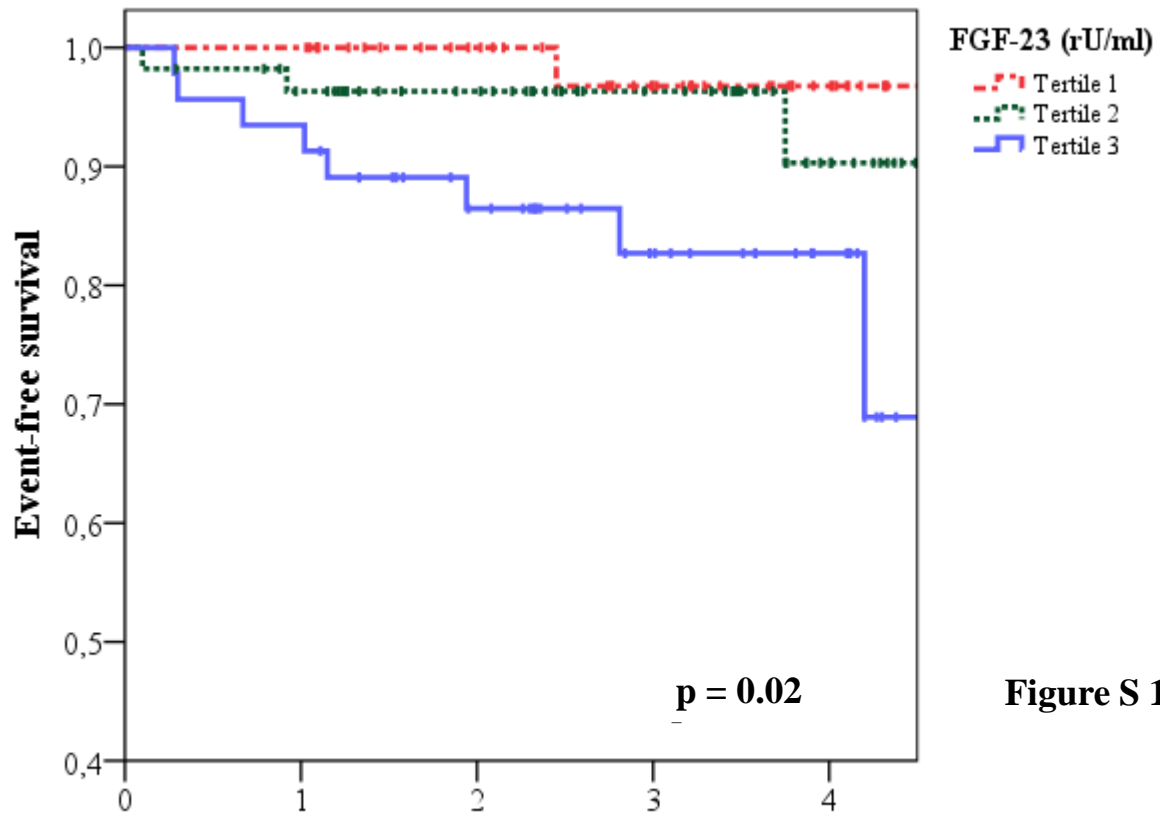

**Figure S 1 b**

**Number at risk**

|                  |    |    |    |    |
|------------------|----|----|----|----|
| <b>Tertile 1</b> | 45 | 34 | 24 | 10 |
| <b>Tertile 2</b> | 49 | 38 | 25 | 9  |
| <b>Tertile 3</b> | 42 | 31 | 19 | 10 |

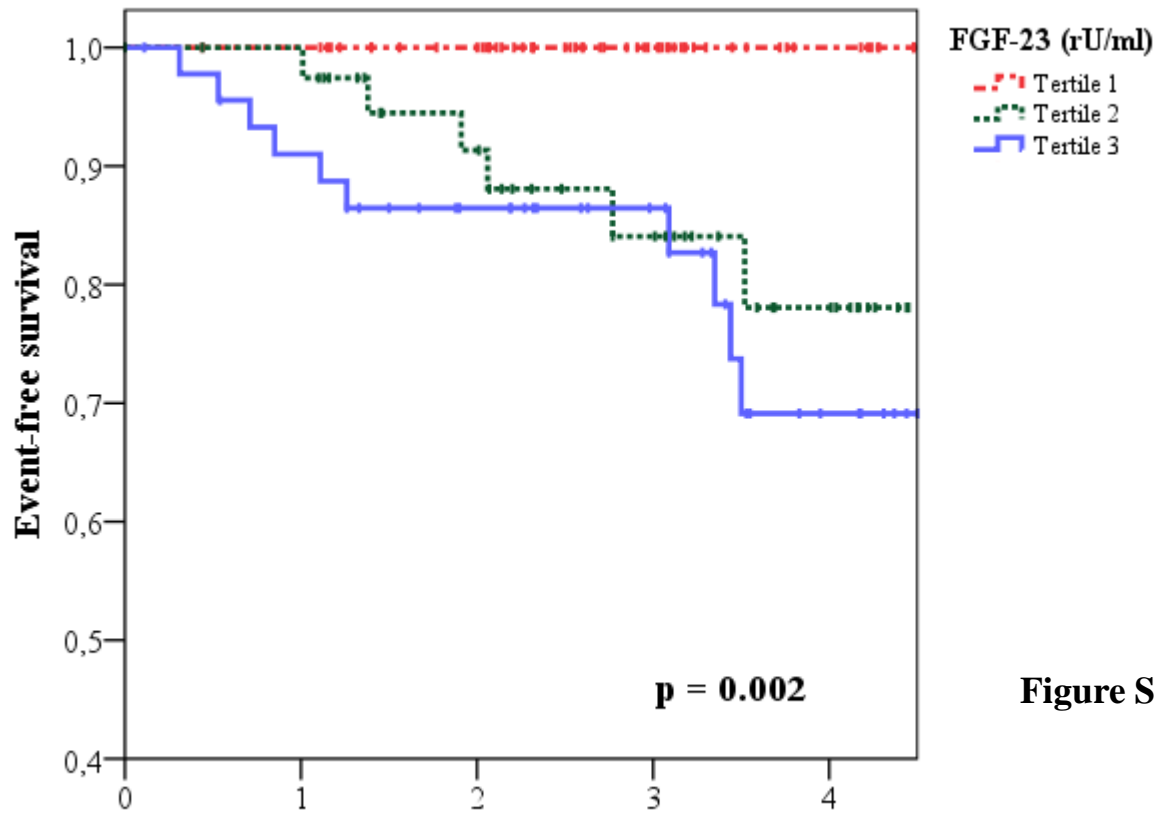

**Figure S 1 c**

**Number at risk**

|                  |    |    |    |    |
|------------------|----|----|----|----|
| <b>Tertile 1</b> | 59 | 51 | 27 | 11 |
| <b>Tertile 2</b> | 38 | 28 | 19 | 9  |
| <b>Tertile 3</b> | 39 | 31 | 23 | 10 |
